# Supplementary material
Source: publisher figshare collection journal article supplement (https://tandf.figshare.com/ndownloader/files/17786156)
Supplement: Supplementary file 1 [file 17786156]

Appendix A. Organizational serial participants (in alphabetical order, twitter accounts are decapitalized).

| # | Twitter Handle @ | Organizational Name | # | Twitter Handle @ | Organizational Name |
| --- | --- | --- | --- | --- | --- |
| 1 | 350 | 350 dot org | 26 | climatesolution | Climate Solutions |
| 2 | 1millionwomen | 1 Million Women | 27 | climatetreaty | Independent climate change news provider |
| 3 | 350australia | 350 Australia | 28 | commondreams | Common Dreams NewsCenter |
| 4 | adbclimate | ADB Climate Tea | 29 | connect4climate | Connect4Climate |
| 5 | alertnetclimate | TRF Climate * (no longer active) | 30 | conversationedu | The Conversation |
| 6 | ap | The Associated Press | 31 | desmogblog | DeSmogBlog |
| 7 | beartrust | Bear Trust International | 32 | earthbuzz1 | Independent climate change news provider |
| 8 | bgalliance | BlueGreen Alliance | 33 | earthisland | Earth Island Institute |
| 9 | businessgreen | Business Green | 34 | earthislandjrnl | Earth Island Journal |
| 10 | caneurope | Climate Action Network Europe | 35 | earthjustice | Earthjustice Organization |
| 11 | canintl | Climate Action Network-International | 36 | ecowatch | EcoWatch |
| 12 | capital_climate | CapitalClimate, a blog dedicated to climate change | 37 | envdefensefund | Environmental Defense Fund |
| 13 | carbonbubble | Carbon Tracker | 38 | euclimateaction | EU Climate Action |
| 14 | cechr_uod | Centre for Environmental Change & Human Resilience | 39 | euractiv | EURACTIV |
| 15 | cgiarclimate | Climate Change, Agriculture and Food Security | 40 | eurogeosciences | European Geosciences Union |
| 16 | citizensclimate | Citizens' Climate Lobby | 41 | galileomovement | The Galileo Movement |
| 17 | cleantechnica | CleanTechnica | 42 | grantham_ic | Grantham Research @ Imperial College |
| 18 | climatecolab | MIT ClimateCoLab | 43 | greenlibdems | Green Liberal Democrats Organization |
| 19 | climatecomms | Climate Communication Project | 44 | greenpeace | Greenpeace |
| 20 | climategroup | The Climate Group | 45 | greenpeaceaustp | Greenpeace Australia Pacific |
| 21 | climateinstitut | The Climate Institute | 46 | greenpeaceusa | Greenpeace USA |
| 22 | climatejustice1 | Global Justice Ecology Project | 47 | gri_lse | Grantham Research Center @LSE |
| 23 | climateprogress | Climate Progress | 48 | grist | Grist Magazine |
| 24 | climaterealists | Climate Realists | 49 | guardian | Guardian |
| 25 | climatereality | The Climate Reality Project | 50 | guardianeco | Guardian Environment |

Appendix A. Organizational serial participants (in alphabetical order, twitter accounts are decapitalized).

| # | Twitter Handle @ | Organizational Name | # | Twitter Handle @ | Organizational Name |
| --- | --- | --- | --- | --- | --- |
| 51 | guardianus | Guardian US | 76 | sciam | Scientific American |
| 52 | heartlandinst | Heartland Institute | 77 | seiclimate | Stockholm environment institute climate & policy research team |
| 53 | huffingtonpost | Huffington Post | 78 | sejorg | Society of Environmental Journalists Organization |
| 54 | huffpostgreen | HuffPost Green | 79 | skollglobal | Skoll Global Threats Fund |
| 55 | huffpostpol | HuffPost Politics | 80 | slate | Slate Magazine |
| 56 | iied | International institute for environment and development | 81 | tcktcktck | TckTckTck |
| 57 | insideclimate | InsideClimate News | 82 | theagu | Am Geophysical Union |
| 58 | ivote4usa | Independent climate change news provider | 83 | thedailyedge | The Daily Edge |
| 59 | lcvoters | The League of Conservation Voters | 84 | thehill | The Hill |
| 60 | leftonmain | Independent climate change news provider | 85 | thenation | The Nation Magazine |
| 61 | lolgop | The GOTMFV Show | 86 | thinkprogress | ThinkProgress |
| 62 | medialens | Media Lens | 87 | time | Time |
| 63 | motherjones | Mother Jones | 88 | tr_foundation | TravisRoyFoundation |
| 64 | natureclimate | Nature Climate Change | 89 | ucsusa | Union of Concerned Scientists |
| 65 | nirsnet | Nuclear Information And Resource Service | 90 | uppsalainit | A Sweden website on climate change |
| 66 | nrdc | Natural Resources Defense Council | 91 | usatoday | USA Today |
| 67 | oxfam | Oxfam International | 92 | uscan | US Climate Action Network |
| 68 | oxfamscotland | Oxfam Scotland | 93 | vinepsychic | Vine Psychic Reading |
| 69 | planetspin1 | Planet Spin | 94 | washingtonpost | The Washington Post |
| 70 | politico | Politico | 95 | watchdogsniffer | Watchdog Progressive |
| 71 | priceofoil | Oil Change International | 96 | wattsupwiththat | Watts Up With That? (website) |
| 72 | rabbleca | rabble.ca | 97 | wegowise | WegoWise: Utility Tracking |
| 73 | renew_economy | RenewEconomy | 98 | wwwfoecouk | Friends of the Earth |
| 74 | reuters | Reuters | 99 | yaleclimatecomm | Yale Program on Climate Change Communication |
| 75 | risingtidena | Rising Tide North America | 100 | yalefes | Yale School of Forestry & Environmental Studies |
